# Supplementary material for: Loss of seryl-tRNA synthetase (SARS1) causes complex spastic paraplegia and cellular senescence
Source: PubMed Central journal article supplement (PMC9691831; doi:10.1136/jmg-2022-108529), 2022-08-30

**SUPPLEMENTAL MATERIAL****Supplemental Table 1: RT-qPCR and RT-PCR primers**

|                    |                                                                  |
|--------------------|------------------------------------------------------------------|
| IL-6<br>(RT-qPCR)  | Forward: AGTCCTGATCCAGTTCCTGC<br>Reverse: CTACATTTGCCGAAGAGCCC   |
| p16<br>(RT-qPCR)   | Forward: CTGAGGAGCTGGGCCATC<br>Reverse: GCAGTTGTGGCCCTGTAG       |
| p21<br>(RT-qPCR)   | Forward: CTGGAGACTCTCAGGGTCGAA<br>Reverse: CCAGGACTGCAGGCTTCCT   |
| p53<br>(RT-qPCR)   | Forward: AAGAAACCACTGGATGGAGAA<br>Reverse: CAGCTCTCGGAACATCTCGSS |
| LMNB1<br>(RT-qPCR) | Forward: AAGCAGCTGGAGTGGTTGTT<br>Reverse: TTGGATGCTCTTGGGGTTC    |
| SARS1<br>(RT-qPCR) | Forward: CCACTACCCGTACCATCTGC<br>Reverse: CTGCCCTCATGTTGCTTCTT   |
| SARS2<br>(RT-qPCR) | Forward: CCTTCTCATCGCGCTCCT<br>Reverse: TGTGGGTGGGTTCTTAGCTT     |
| H36B4<br>(RT-qPCR) | Forward: ACGGGTACAAACGAGTCCTG<br>Reverse: GCCTTGACCTTTTCAGCAAG   |
| SARS1<br>(RT-PCR)  | Forward: GGAACAGGCTCTCATCCAGTA<br>Reverse: AGGAGACCAACTCACGGAAG  |

**Supplemental Table 2: Yeast strains used in this study.**

| Name           | Genotype                                                                                                                                                                                     | Source     |
|----------------|----------------------------------------------------------------------------------------------------------------------------------------------------------------------------------------------|------------|
| Y23962         | MATa/MAT $\alpha$ ; ura3 $\Delta$ 0/ura3 $\Delta$ 0; leu2 $\Delta$ 0/leu2 $\Delta$ 0; his3 $\Delta$ 1/his3 $\Delta$ 1; met15 $\Delta$ 0/MET15; LYS2/lys2 $\Delta$ 0; YDR023w/YDR023w::kanMX4 | EUROSARF   |
| hSARS shuffle  | MATa; ura3 $\Delta$ 0; leu2 $\Delta$ 0; his3 $\Delta$ 1;YDR023w::kanMX4<br>+ pRS316-hSARS                                                                                                    | This study |
| WT             | MATa; ura3 $\Delta$ 0; leu2 $\Delta$ 0; his3 $\Delta$ 1;YDR023w::kanMX4<br>+ pRS316-ySARS + pRS315                                                                                           | This study |
| hSARS          | MATa; ura3 $\Delta$ 0; leu2 $\Delta$ 0; his3 $\Delta$ 1;YDR023w::kanMX4<br>+ pRS316-hSARS + pRS315                                                                                           | This study |
| hSARS + hSARSm | MATa; ura3 $\Delta$ 0; leu2 $\Delta$ 0; his3 $\Delta$ 1;YDR023w::kanMX4<br>+ pRS316-hSARS + pRS315-hSARSm                                                                                    | This study |

**Supplemental Figure 1: RT-PCR and cDNA sequencing results from fibroblasts for SARS1-mutated patient and a control.** A: Agarose gel electrophoresis image showing RT-PCR products. B: Sanger sequencing results of patient and control RT-PCR products. C: Sanger sequencing results of WT/mutated sequences after cloning patient's cDNA PCR products into a pCMV-Tag2 plasmid.

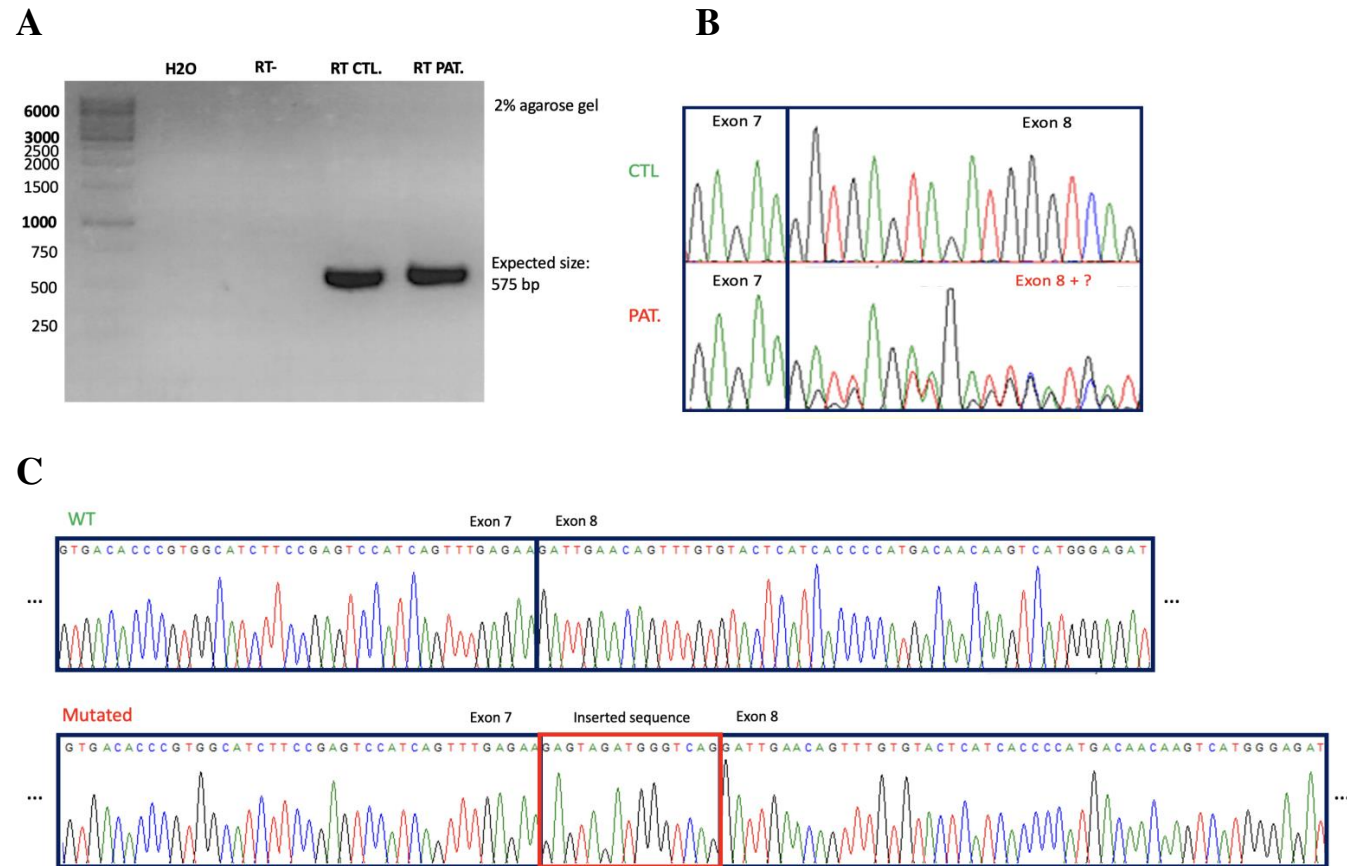

**Supplemental Figure 2: Conservation of mutation site in SARS1.** p.Lys323\_Ile324 insSerArgTrpValArg insertion is located in an evolutionary conserved region of SARS1 protein. Motif 2 (291-329 aa) is colored in yellow, and contains active site residues important for SARS1 aminoacylation (in boxes).

|                        | <b>p.K323_I324insSRWVR</b>                    |     | % IDENTITY |
|------------------------|-----------------------------------------------|-----|------------|
| <i>H. sapiens</i>      | I F R V H Q <b>F</b> E K I <b>E</b> Q F V Y S | 330 |            |
| <i>P. troglodytes</i>  | I F R V H Q <b>F</b> E K I <b>E</b> Q F V Y S | 330 | 99,81      |
| <i>M. musculus</i>     | I F R V H Q <b>F</b> E K I <b>E</b> Q F V Y S | 330 | 95,90      |
| <i>G. gallus</i>       | I F R V H Q <b>F</b> E K I <b>E</b> Q F V Y A | 330 | 85,80      |
| <i>X. tropicalis</i>   | I F R V H Q <b>F</b> E K I <b>E</b> Q F I Y A | 329 | 81,57      |
| <i>D. rerio</i>        | I F R V H Q <b>F</b> E K I <b>E</b> Q F V Y A | 330 | 81,52      |
| <i>D. melanogaster</i> | I F R V H Q <b>F</b> E K V <b>E</b> Q F V L T | 331 | 68,95      |
| <i>C. elegans</i>      | I F R V H Q <b>F</b> E K I <b>E</b> Q F V L C | 330 | 66,26      |
| <i>S. cerevisiae</i>   | V F R V H A <b>F</b> E K I <b>E</b> Q F V I T | 305 | 49,89      |
| <i>E. coli</i>         | L I R M H Q <b>F</b> D K V <b>E</b> M V Q I V | 296 | 32,94      |

**Supplemental Figure 3: Diploid *S cerevisiae* yeast strains used for complementation assays.** Tetrad analysis of haploid spores showed that haploid strains containing pRS316-hSARSm (carrying the SARS1 mutation) did not grow.

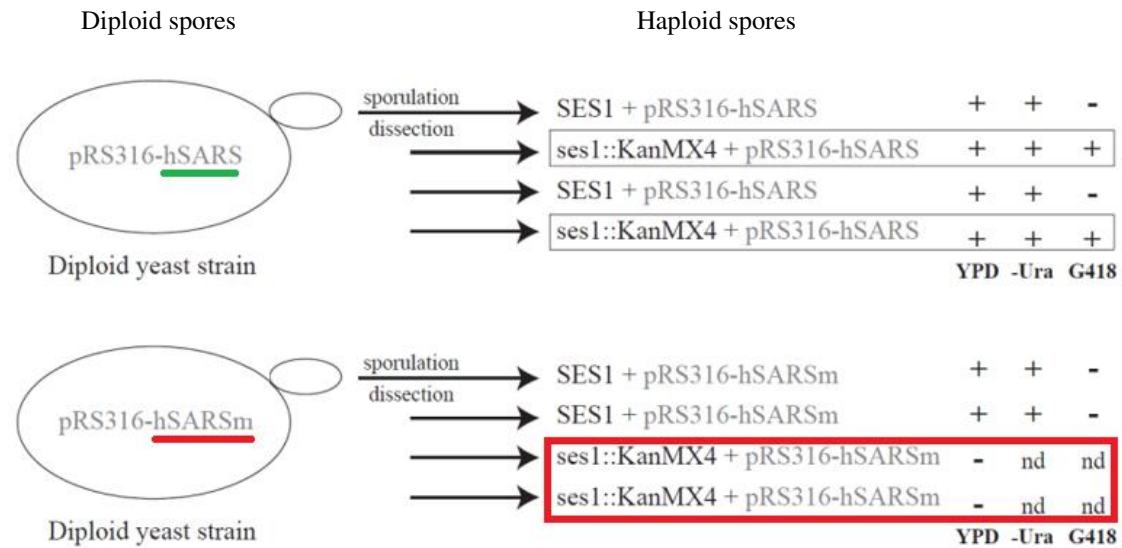

Supplement: jmg-2022-108529supp001.pdf [file jmg-2022-108529supp001.pdf]
